# Supplementary material for: A sensitive red light nano-photodetector propelled by plasmonic copper nanoparticles
Source: Royal Society of Chemistry journal article supplement (doi:10.1039/c6tc05117k), 2016-12-21
Supplement: c6tc05117k1.pdf [file c6tc05117k1.pdf]

## Supporting Information

### High-performance red light nano-photodetector enabled by plasmonic Cu nanoparticles

Dan-Dan Wang, Cai-Wang Ge, Guo-An Wu, Jiu-Zhen Wang, Teng-Fei Zhang, Yong-Qiang Lin-

Bao Luo\*

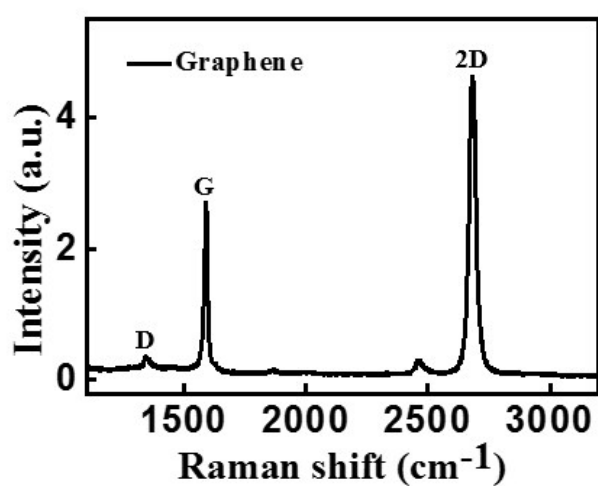

Figure S1. Raman spectrum of the multi-layer graphene film.

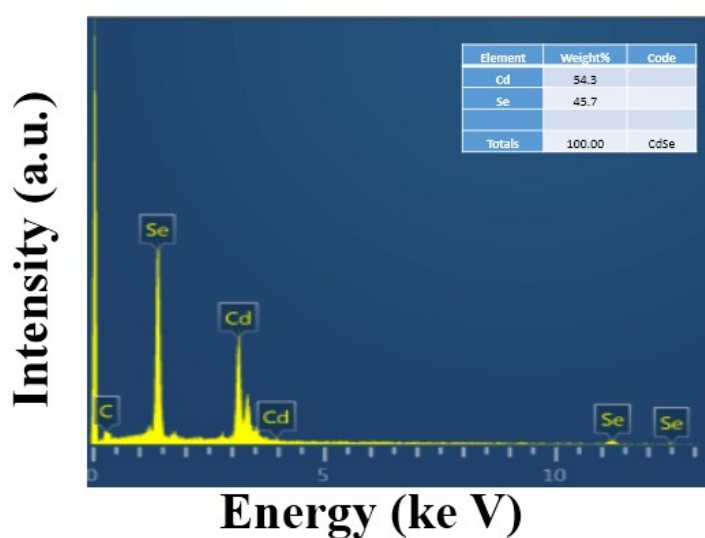

Figure S2. The energy dispersive spectrometer (EDS) analysis of the CdSeNRs.

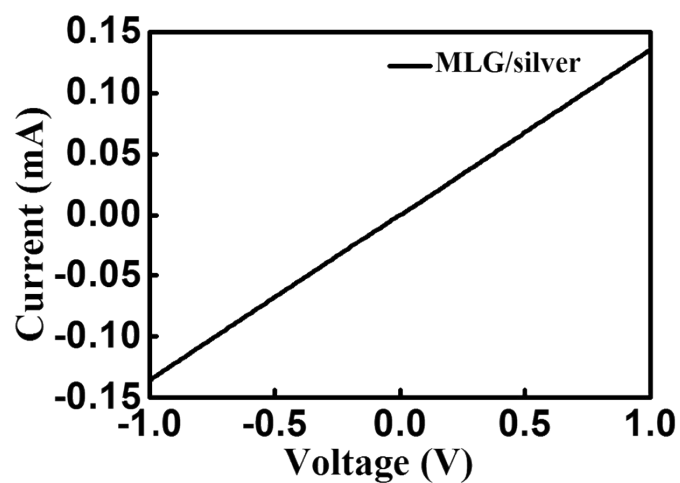

Fig.S3 The  $I$ - $V$  curve of graphene and the silver electrode

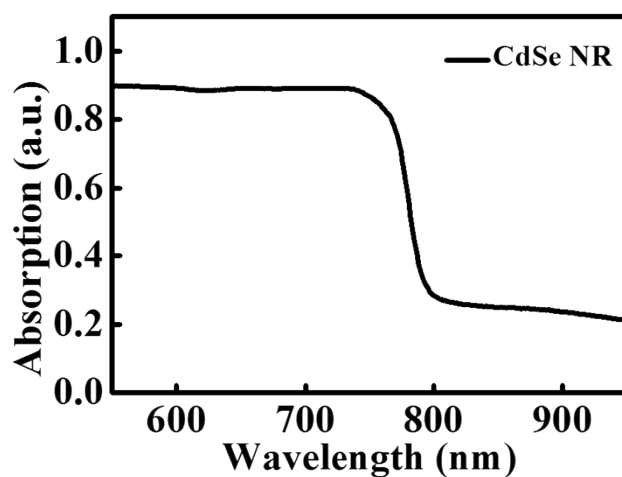

Fig.S4 The absorption curve of the CdSeNRs.

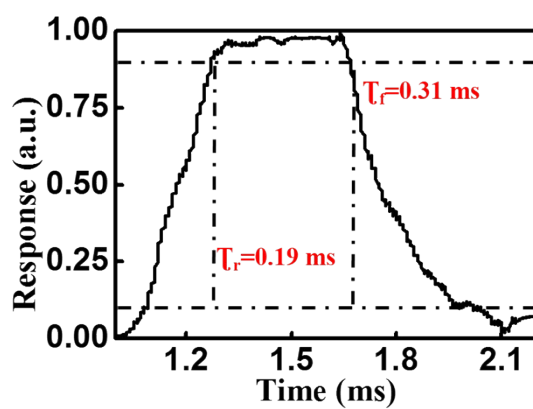

Fig.S5 Rising and falling edges for determining  $\tau_r$  and  $\tau_f$  of the PD before decoration with CuNPs array.

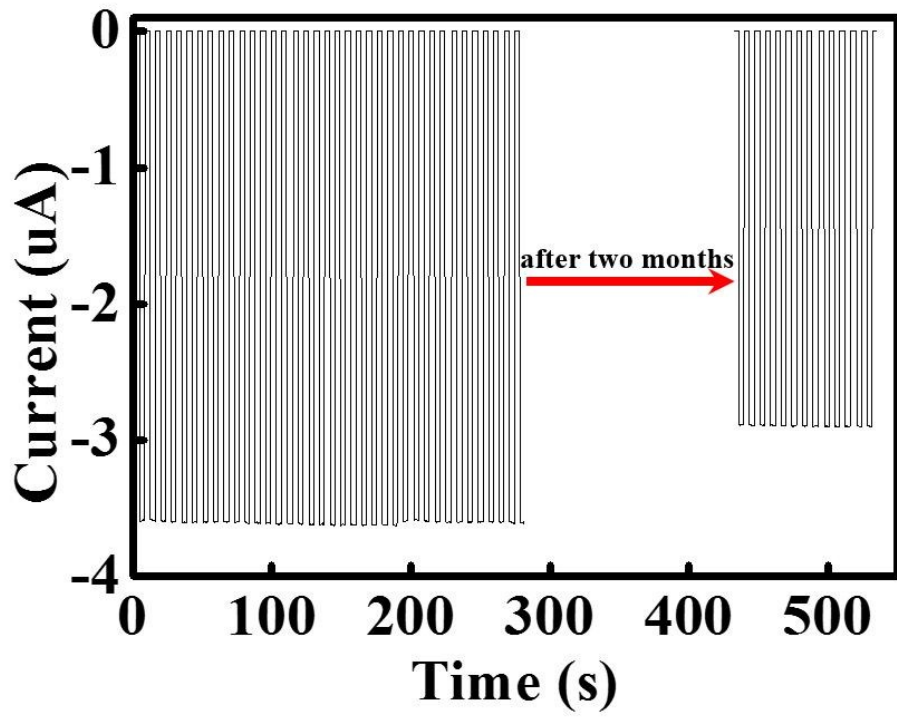

Fig. S6. Photoresponse of the plasmonic nano-photodetector after 2 months storage.
